# Supplementary material for: Flocculation of dissolved organic matter controls the distribution of iron in boreal estuarine sediments
Source: Copernicus journal article supplement (doi:10.5194/bg-2017-181), 2017-05-19
Supplement: Supplementary file 1 [file bg-2017-181-supplement.pdf]

1 **Supplementary material to “Flocculation of dissolved organic matter controls the distribution of iron**  
2 **in boreal estuarine sediments”**

3

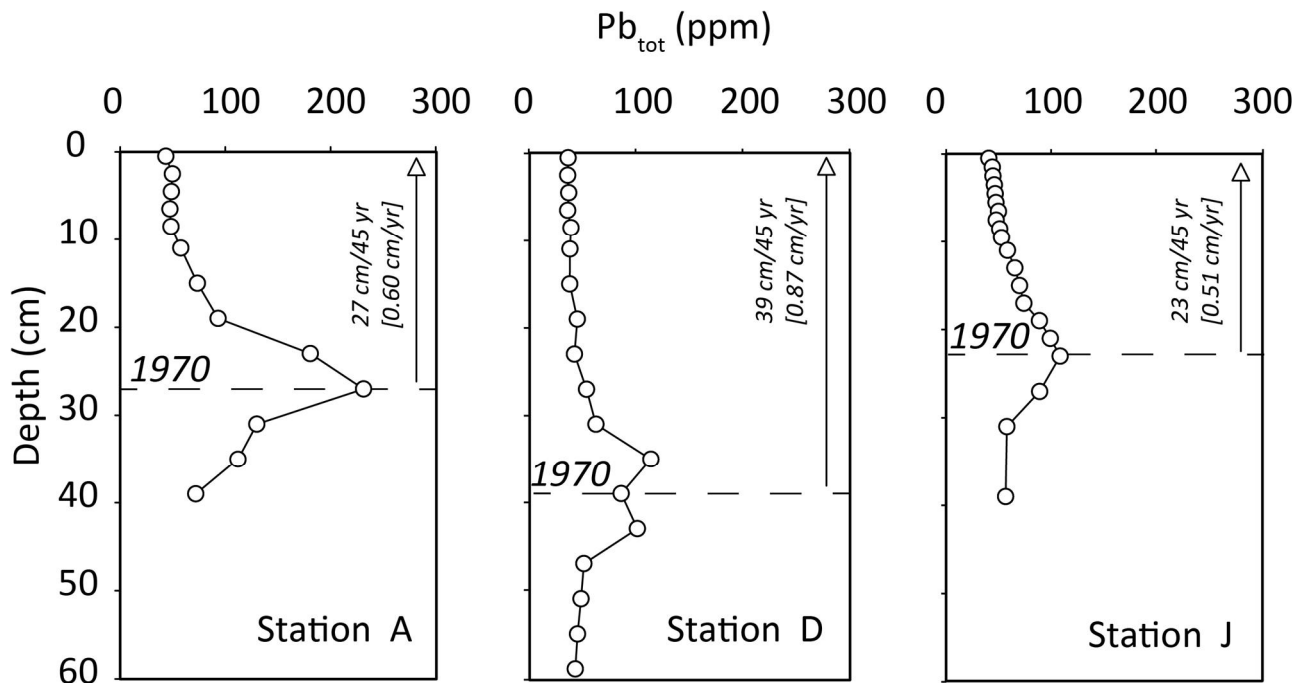

4

5

6 **Supplementary Figure 1. Total lead ( $P_{tot}$ ) concentrations in sediment cores from stations A, D and J in**  
7 **2015, determined by ICP-OES. The peak in  $P_{tot}$  is assumed equivalent to the year 1970 (Zillen et al.,**  
8 **2012). Mean sedimentation rates for each core were estimated for the interval 1970-2015 as indicated in**  
9 **the panels.**
